# Supplementary material for: Pre-existing TGF-β-specific T-cell immunity in patients with pancreatic cancer predicts survival after checkpoint inhibitors combined with radiotherapy
Source: PubMed Central journal article supplement — J Immunother Cancer. 2023 Mar 22;11(3):e006432. doi: 10.1136/jitc-2022-006432 (PMC10040073; doi:10.1136/jitc-2022-006432), 2023-03-22
Supplement: jitc-2022-006432supp001.pdf [file jitc-2022-006432supp001.pdf]

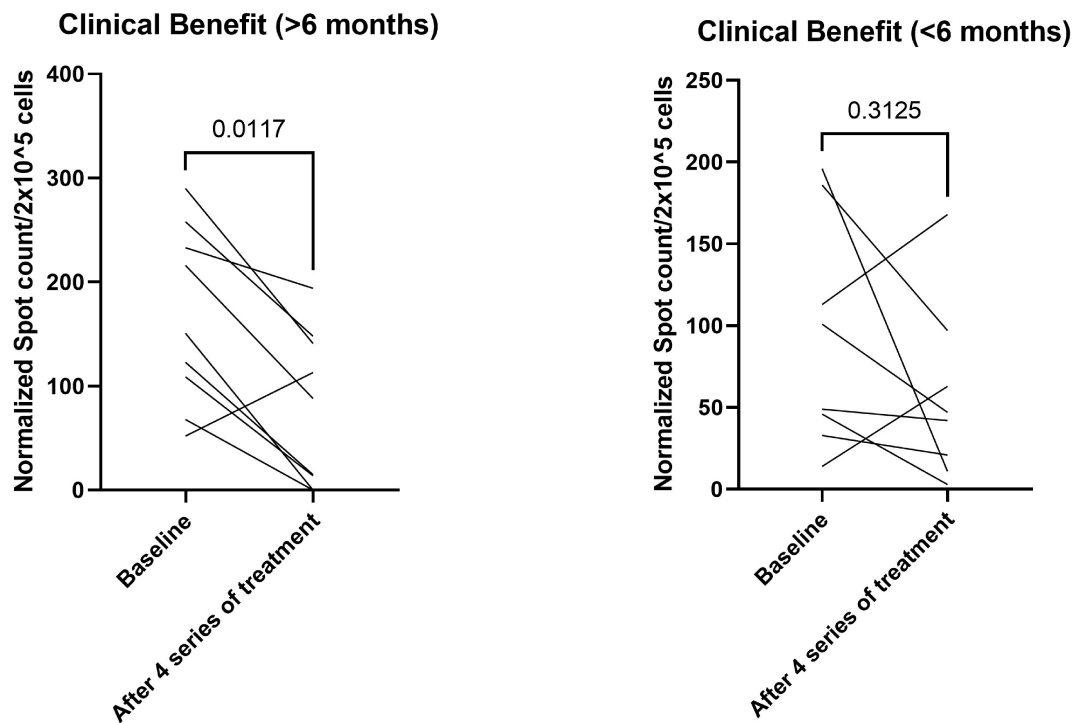

Supplementary Figure 1. Differences in decline of the TGF $\beta$ -15 specific immune responses in patients with lasting clinical benefit vs. patients without lasting clinical benefit.

Comparison of TGF $\beta$ -15 specific immune response at baseline and after four series of treatment in patients with lasting clinical benefit (left) and without lasting clinical benefit (right).

Lasting clinical benefit defined as a PR or SD lasting longer than 6 months. Statistics made using Wilcoxon matched-pairs signed rank test.
