# Supplementary material for: Pre-existing TGF-β-specific T-cell immunity in patients with pancreatic cancer predicts survival after checkpoint inhibitors combined with radiotherapy
Source: PubMed Central journal article supplement — J Immunother Cancer. 2023 Mar 22;11(3):e006432. doi: 10.1136/jitc-2022-006432 (PMC10040073; doi:10.1136/jitc-2022-006432), 2023-03-22
Supplement: jitc-2022-006432supp002.pdf [file jitc-2022-006432supp002.pdf]

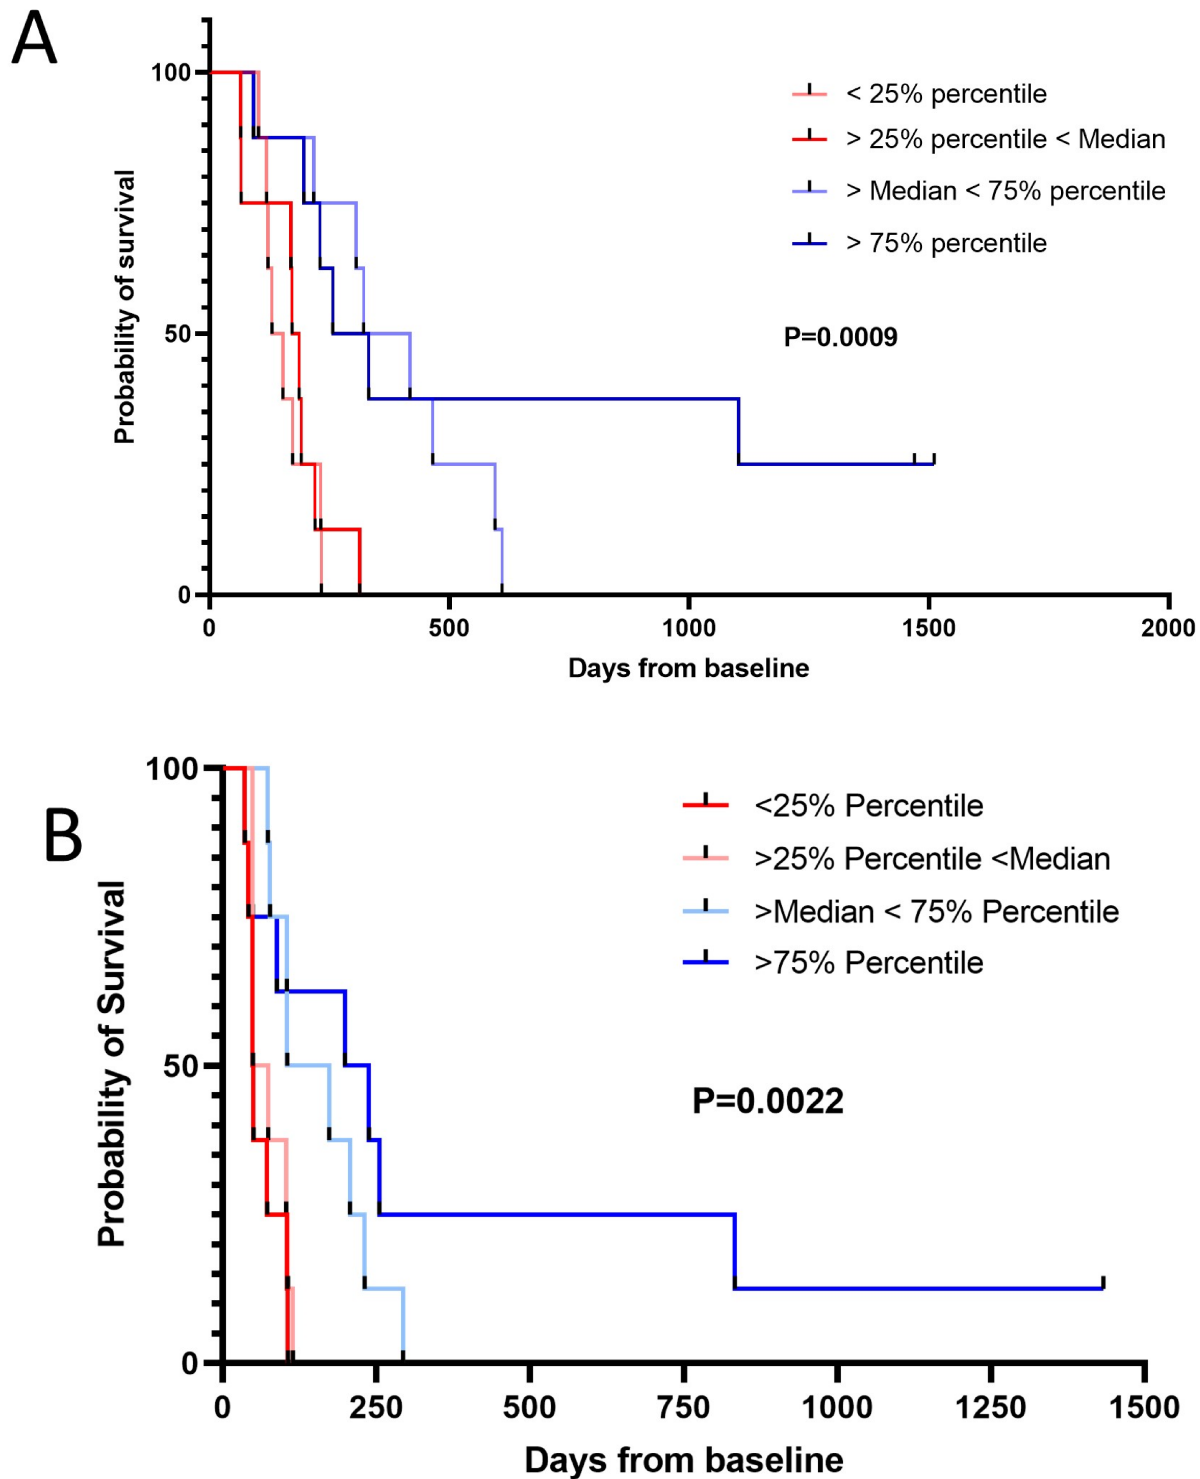

Supplementary Figure 2. Survival analysis in patients based on the amplitude of the TGF $\beta$ -15 specific response. **A.** Analysis of overall survival in patients based on the normalized TGF $\beta$ -15 responses. Patients were divided in to four groups depending on the amplitude of the TGF $\beta$ -15 specific response. **B.** Analysis of progression free survival as in A. Statistics performed using the log-rank test.
