# Supplementary material for: Pre-existing TGF-β-specific T-cell immunity in patients with pancreatic cancer predicts survival after checkpoint inhibitors combined with radiotherapy
Source: PubMed Central journal article supplement — J Immunother Cancer. 2023 Mar 22;11(3):e006432. doi: 10.1136/jitc-2022-006432 (PMC10040073; doi:10.1136/jitc-2022-006432), 2023-03-22
Supplement: jitc-2022-006432supp003.pdf [file jitc-2022-006432supp003.pdf]

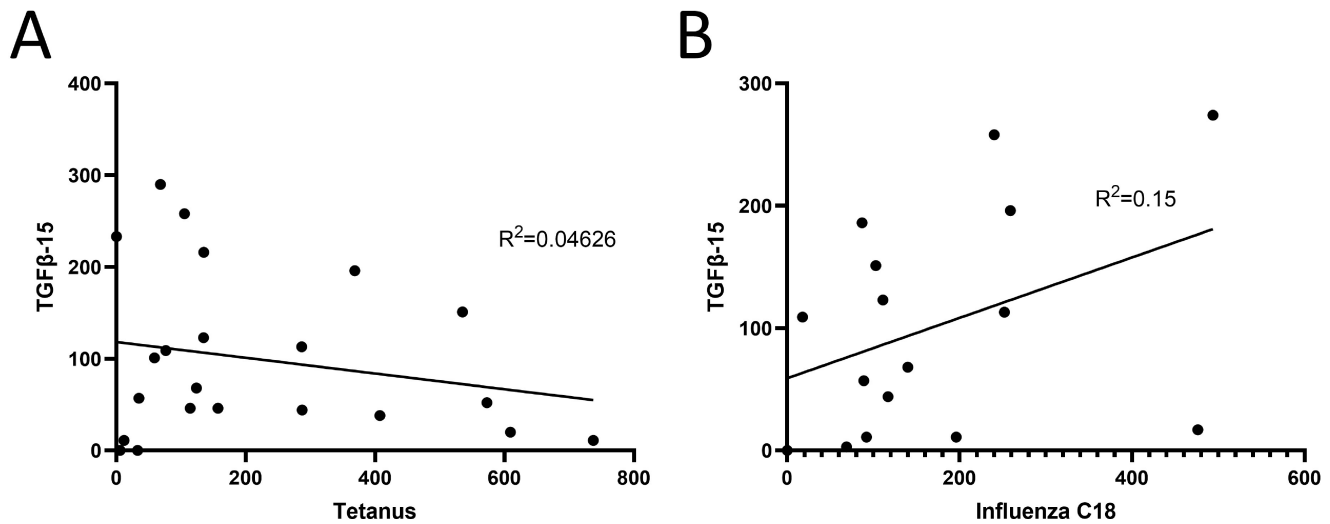

**Supplementary Figure 3. Correlation between TGFβ-15 specific responses and responses to tetanus epitope. A.** Normalized responses to TGFβ-15 and tetanus responses were plotted and correlation analyzed using simple linear regression. **B.** Normalized responses to TGFβ-15 and influenza responses were plotted and correlation analyzed using simple linear regression.
