# Supplementary material for: Pre-existing TGF-β-specific T-cell immunity in patients with pancreatic cancer predicts survival after checkpoint inhibitors combined with radiotherapy
Source: PubMed Central journal article supplement — J Immunother Cancer. 2023 Mar 22;11(3):e006432. doi: 10.1136/jitc-2022-006432 (PMC10040073; doi:10.1136/jitc-2022-006432), 2023-03-22
Supplement: jitc-2022-006432supp005.pdf [file jitc-2022-006432supp005.pdf]

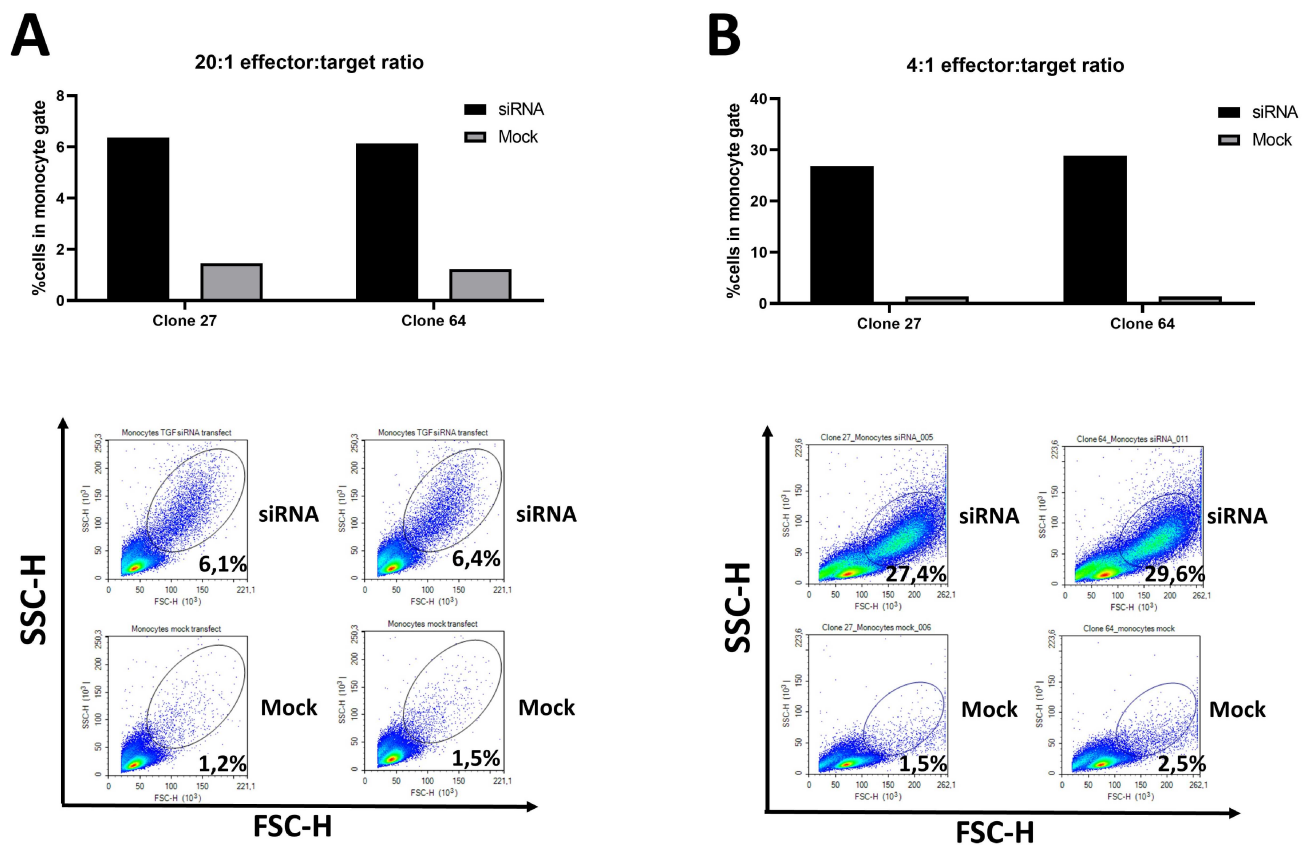

**Supplementary Figure 5. Regulatory myeloid cells are killed by TGF $\beta$ -15 specific T cells in a TGF $\beta$  dependent manner. A.** Autologous myeloid cells that were either mock transfected or transfected with TGF $\beta$  siRNA were assayed in an intracellular cytokine staining with an effector:target ratio of 20:1. Upon subsequent analysis by flow cytometry, the amount of regulatory myeloid cells was assessed and depicted graphically (top) with density plots from experiment shown (below). **B.** Experiment with same effector and target cells was reperformed but with an effector:target ratio of 4:1 with amount of live regulatory myeloid cells shown (top) and density plots (below).
