# Supplementary material for: Pre-existing TGF-β-specific T-cell immunity in patients with pancreatic cancer predicts survival after checkpoint inhibitors combined with radiotherapy
Source: PubMed Central journal article supplement — J Immunother Cancer. 2023 Mar 22;11(3):e006432. doi: 10.1136/jitc-2022-006432 (PMC10040073; doi:10.1136/jitc-2022-006432), 2023-03-22
Supplement: jitc-2022-006432supp006.pdf [file jitc-2022-006432supp006.pdf]

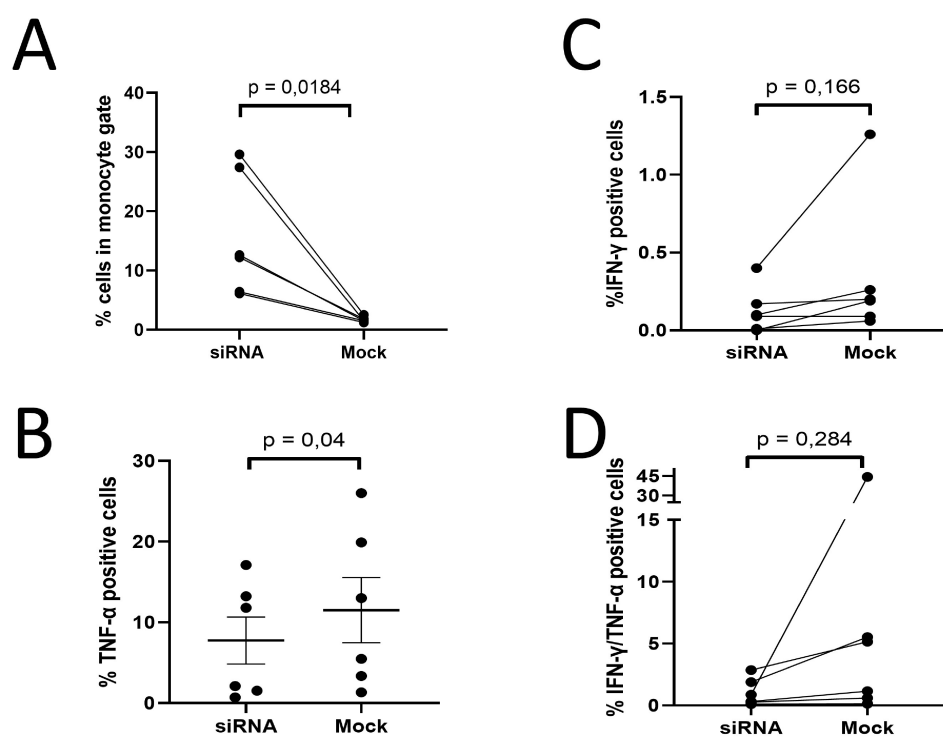

Supplementary Figure 6. Stimulation of TGFβ-15 specific T cell clones with either mock or TGFβ siRNA transfected regulatory myeloid cells results in statistically significant differences in the amount of live myeloid cells and TNF-α release by effector T cells. **A**, Compiled amount of cells in the monocyte gate for the three independent siRNA experiments outlined in the materials and methods and results section. **B**, Compiled amount of TNF-α expressing effector T-cells for the three independent siRNA experiments outlined in the materials and methods section. **C**, Compiled amount of IFN-γ expressing effector T-cells for the three independent siRNA experiments outlined in the materials and methods section. **D**, Compiled amount of IFN-γ/ TNF-α expressing effector T-cells for the three independent siRNA experiments outlined in the materials and methods section. Statistical analysis performed with a paired t-test.
