# Supplementary material for: Pre-existing TGF-β-specific T-cell immunity in patients with pancreatic cancer predicts survival after checkpoint inhibitors combined with radiotherapy
Source: PubMed Central journal article supplement — J Immunother Cancer. 2023 Mar 22;11(3):e006432. doi: 10.1136/jitc-2022-006432 (PMC10040073; doi:10.1136/jitc-2022-006432), 2023-03-22
Supplement: jitc-2022-006432supp007.pdf [file jitc-2022-006432supp007.pdf]

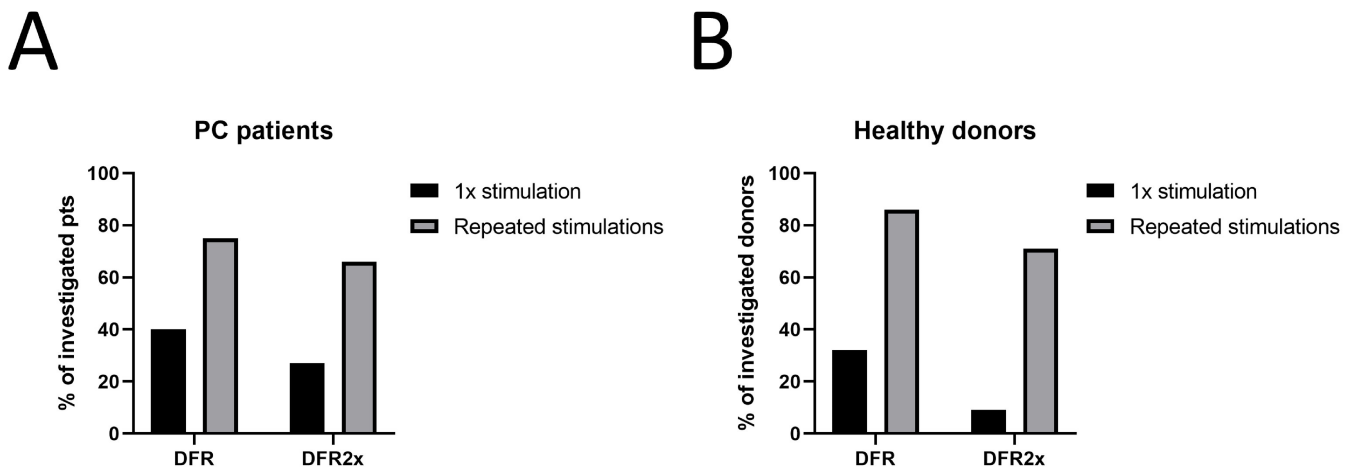

**Supplementary Figure 7. Increased frequency of immune responses to TGF $\beta$ -15 after repeated peptide stimulations. A.** Frequency of immune responses according to the distribution free resampling (DFR) method and the more conservative DFR2x method after 1 or several stimulations in PC patients. **B.** Comparison as in A but in healthy donors.
