# Supplementary material for: Pre-existing TGF-β-specific T-cell immunity in patients with pancreatic cancer predicts survival after checkpoint inhibitors combined with radiotherapy
Source: PubMed Central journal article supplement — J Immunother Cancer. 2023 Mar 22;11(3):e006432. doi: 10.1136/jitc-2022-006432 (PMC10040073; doi:10.1136/jitc-2022-006432), 2023-03-22
Supplement: jitc-2022-006432supp008.pdf [file jitc-2022-006432supp008.pdf]

| <u>Antibody</u>   | <u>Fluorochrome</u> | <u>Filter</u> | <u>µl/test</u> | <u>Clone,</u> | <u>Catalog #</u> | <u>Company</u>                   |
|-------------------|---------------------|---------------|----------------|---------------|------------------|----------------------------------|
| <u>Perforin</u>   | FITC                | 530/30        | 2,5µl          | B-D48         | 353310           | <u>BioLegend</u>                 |
| <u>Granzyme B</u> | APC                 | 660/20        | 1,25µl         | GB-11         | GRB05            | Fisher Scientific                |
| <u>CD3</u>        | AF700               | 725/40        | 1,25µl         | UCHT1         | 300424           | <u>BioLegend</u>                 |
| <u>NIR (DEAD)</u> | APC-Cy7             | 780/60        | 4µl            |               | L34993           | <u>Invitrogen/AH Diagnostics</u> |
| <u>CD107a</u>     | BV421               | 445/45        | 0,3µl          | H4A3          | 566261           | BD                               |
| <u>IFN-g</u>      | BV510               | 530/30        | 2,5µl          | 4S.B3         | 502543           | <u>BioLegend</u>                 |
| <u>CD8</u>        | BV605               | 615/20        | 5µl            | SK1,          | 344742           | <u>BioLegend</u>                 |
| <u>CD4</u>        | BV711               | 725/40        | 5µl            | OKT4          | 317440           | <u>BioLegend</u>                 |
| <u>Granulysin</u> | PE                  | 586/20        | 2,5µl          | DH2           | 348003           | <u>BioLegend</u>                 |
| <u>TNFa</u>       | PE-CF594            | 615/20        | 5µl            | MAb11         | 562784           | BD                               |
| <u>IL2</u>        | PE-Cy7              | 780/60        | 2,5µl          | MQ1-17H12     | 25-7029-42       | <u>Invitrogen/AH Diagnostics</u> |

**Supplementary table 1. Antibodies used for expanded flow cytometric analysis of TGFβ-15 specific T-cell clones ability to recognize regulatory myeloid cells.**
