# Supplementary material for: Pre-existing TGF-β-specific T-cell immunity in patients with pancreatic cancer predicts survival after checkpoint inhibitors combined with radiotherapy
Source: HighWire-hosted journal article supplement (doi:10.1136/jitc-2022-006432), 2023-03-01
Supplement: jitc-2022-006432supp009_data_supplement.pdf [file jitc-2022-006432supp009_data_supplement.pdf]

Supplementary table 2. Patient characteristics.

| Characteristics                                  |                                  | Total          | %   |    |
|--------------------------------------------------|----------------------------------|----------------|-----|----|
| <b>Patients, n</b>                               |                                  | 32             | 100 |    |
| <b>Sex</b>                                       | Male                             | 18             | 56  |    |
|                                                  | Female                           | 14             | 44  |    |
| <b>Age in years, median (range)</b>              | Median                           | 67.5 (47-80)   |     |    |
| <b>Treatment</b>                                 | Radiation+Nivolumab+Ipilimumab   | 17             | 53  |    |
|                                                  | Radiation+Nivolumab              | 15             | 47  |    |
| <b>Best obtained clinical response</b>           |                                  |                |     |    |
|                                                  | PR                               | 7              | 22  |    |
|                                                  | SD                               | 14             | 44  |    |
|                                                  | PD                               | 11             | 34  |    |
| <b>PFS status at last follow up</b>              | Progression                      | 31             | 97  |    |
|                                                  | No progression                   | 1              | 3   |    |
| <b>Survival status at last follow up</b>         | Deceased                         | 30             | 94  |    |
|                                                  | Alive                            | 2              | 6   |    |
| <b>Follow up days, median (range)</b>            |                                  | 219 (65-1511)  |     |    |
| <b>Histology</b>                                 | Pancreatic ductal adenocarcinoma | 29             | 91  |    |
|                                                  | Unspecified                      | 3              | 9   |    |
| <b>CA199, median (range)</b>                     |                                  | 709 (3-10000)  |     |    |
| <b>CRP, median (range)</b>                       |                                  | 13.5 (3-170)   |     |    |
| <b>Bilirubin, median (range)</b>                 |                                  | 9 (5-47)       |     |    |
| <b>Absolute neutrophil count, median (range)</b> |                                  | 5 (1.2-14.5)   |     |    |
| <b>Albumin, median (range)</b>                   |                                  | 41 (32-49)     |     |    |
| <b>Lymphocyte count, median (range)</b>          |                                  | 1.45 (0.9-2.5) |     |    |
| <b>NLR, median (range)</b>                       | High                             | 10             | 31  |    |
|                                                  | Low                              | 22             | 69  |    |
| <b>mGPS</b>                                      |                                  | 0              | 13  | 41 |
|                                                  |                                  | 1              | 18  | 56 |
|                                                  |                                  | 2              | 1   | 3  |
| <b>Best obtained response to last the</b>        | PR                               | 6              | 19  |    |
|                                                  | SD                               | 11             | 34  |    |
|                                                  | PD                               | 15             | 47  |    |
| <b>Prior lines of therapy</b>                    |                                  | 1              | 13  | 41 |
|                                                  |                                  | 2              | 13  | 41 |
|                                                  |                                  | 3              | 5   | 16 |
|                                                  |                                  | 4              | 1   | 3  |
